# C-Reactive Protein in Diabetic and Nondiabetic Patients With Acute Myocardial Infarction

WOLFGANG OTTER, MD<sup>1,2</sup>  
MICHAEL WINTER, MD<sup>3</sup>  
WITTICH DOERING, MD<sup>1</sup>

EBERHARD STANDL, MD<sup>3</sup>  
OLIVER SCHNELL, MD<sup>3</sup>

**A**therosclerosis has been reported to be associated with chronic low-grade inflammation of the vascular structure and the endothelial cells (1–4). C-reactive-protein (CRP) is a marker for inflammation and is enhanced in both atherosclerosis and coronary artery disease (5–7). CRP plasma levels above the cutoff of 3 mg/l, as assessed with high-sensitivity immunoassays, have been shown to indicate an increase in cardiovascular risk (8). Diabetes is an independent risk factor of atherosclerosis (9,10). It is considered a state of low-grade inflammation (11–13). CRP levels have been reported to be augmented in diabetic patients (11–13). The Munich Myocardial Infarction Registry analyzes the outcome of hospital mortality in both diabetic and nondiabetic subjects (13,14). The present study aimed at determining the role of CRP in patients with myocardial infarction and comparing the results between diabetic and nondiabetic patients.

## RESEARCH DESIGN AND METHODS

All patients of the Munich Myocardial Infarction Registry (2001–2004,  $n = 1,237$ ) were included in the analysis. Myocardial infarction was defined and treated according to the recommendations of the European Society of Cardiology and the American College of Cardiology (15,16–18).

The presence of diabetes was defined if the patient had been informed of this

diagnosis or was on prescribed anti-diabetes treatment. Patients without diagnosis but with blood glucose  $\geq 200$  mg/dl (3) were also classified as having diabetes (14). CRP was measured on admission and analyzed by a highly sensitive CRP-Assay, (Roche Diagnostics, Basel, Switzerland).

## Statistics

Group comparisons were performed by Mann-Whitney  $U$  test for continuous variables and  $\chi^2$  test for categorical variables. Crude odds ratios (ORs) and 95% CIs were adjusted for age, sex, renal failure, and diabetes. Multiple logistic regression analysis was performed as binary logistic regression analysis after transformation of the non-normally distributed CRP levels into quintiles and dichotomization of age.

**RESULTS**— In the entire group of patients ( $n = 1,237$ ), mean age was  $68 \pm 13$  years. Thirty-seven percent presented with previously known coronary artery disease and 25% with a history of previous myocardial infarction. Sixty-four percent presented with hypertension, and 28% had an impaired kidney function. Total hospital mortality of the entire group of patients was 15.9% ( $n = 210$ ). There were 479 patients (38.7%) who presented with diabetes.

In the entire group of patients with acute myocardial infarction, the median

(25th–75th percentile) CRP on admission was 7 mg/l (3–25). Glucose levels on admission were not significantly different between patients with CRP levels equal to or below the median compared with those with CRP levels above the median ( $166 \pm 68$  vs.  $175 \pm 86$  mg/dl, respectively). In patients with CRP levels above the median, hospital mortality was higher compared with that for patients with CRP levels equal to or below the median (20 vs. 9%, respectively;  $P < 0.001$ ). In patients who died in the hospital ( $n = 210$ ), median CRP levels were higher (22 mg/l) compared with those in patients who survived (6 mg/l;  $P < 0.001$ ).

After multiple correction for age, presence of diabetes, impairment of kidney function, hypertension, presence of reinfarction, and known peripheral arterial disease, CRP levels remained an independent predictor of hospital mortality in patients with acute myocardial infarction (highest vs. lowest quintile of CRP levels: OR [95% CI] 4.66 [2.28–9.53];  $P < 0.001$ ).

CRP plasma levels on admission were higher in diabetic than in nondiabetic patients: median (25th–75th percentile) 8 mg/l (3–36) vs. 6 mg/l (3–20) ( $P = 0.001$ ). The prevalence of diabetes rose with the level of elevation of CRP plasma levels (1st quintile [2 mg/l], 38%; 2nd [3–4 mg/l], 30%; 3rd [5–9 mg/l], 35%; 4th [10–40 mg/l], 43%; and 5th [ $>40$  mg/l], 46%;  $P$  for trend  $<0.01$ ).

Diabetic patients who died in the hospital presented with higher CRP plasma levels on admission compared with those presented by diabetic patients who survived: median (25th–75th percentile) 23 mg/l (6–77) vs. 7 mg/l (2–26), respectively;  $P < 0.001$ . Nondiabetic patients who died in the hospital also presented with higher CRP levels compared with those in patients who survived: 16 mg/l (5–98) vs. 5 mg/l (2–17);  $P < 0.001$ .

Hospital mortality with regard to CRP quintiles in diabetic and nondiabetic patients are displayed in Fig. 1. In both diabetic and nondiabetic patients, CRP levels remained a significant predictor for hospital mortality after correction for age, kidney dysfunction, hypertension, reinfarction,

From <sup>1</sup>Cardiology, Academical Teaching Hospital, Schwabing, Munich, Germany; the <sup>2</sup>Center of Internal Medicine, Unterschleissheim/Munich, Germany; and the <sup>3</sup>Diabetes Research Institute, Munich, Germany.

Address correspondence and reprint requests to Wolfgang Otter, MD, Center of Internal Medicine, Unterschleissheim/Munich, Rathausplatz 2, 85716 Unterschleissheim/Munich, Germany. E-mail: w.otter@t-online.de.

Received for publication 28 May 2007 and accepted in revised form 4 September 2007.

Published ahead of print at <http://care.diabetesjournals.org> on 11 September 2007. DOI: 10.2337/dc07-1020.

**Abbreviations:** CRP, C-reactive protein.

A table elsewhere in this issue shows conventional and Système International (SI) units and conversion factors for many substances.

© 2007 by the American Diabetes Association.

The costs of publication of this article were defrayed in part by the payment of page charges. This article must therefore be hereby marked "advertisement" in accordance with 18 U.S.C. Section 1734 solely to indicate this fact.

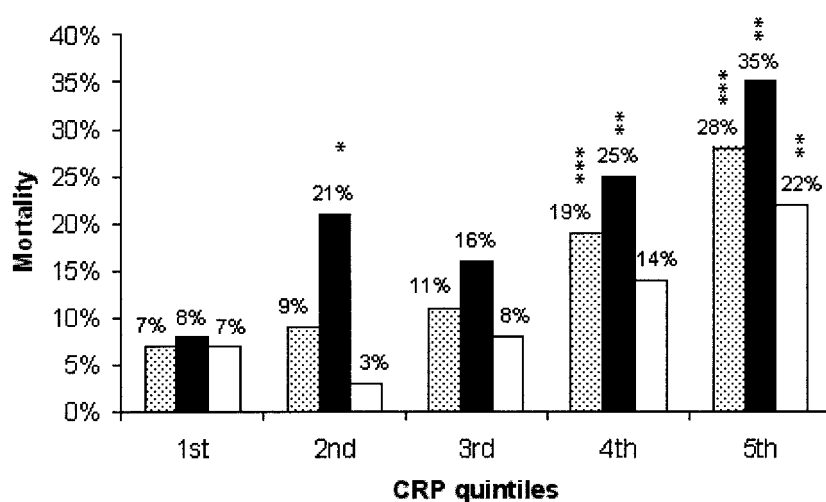

**Figure 1**—CRP quintiles in acute myocardial infarction (1st quintile, <3 mg/dl; 2nd, 3–4 mg/dl; 3rd, 5–9 mg/dl; 4th, 10–40 mg/dl; and 5th, >40 mg/dl). P for trend vs. lowest quintile: \* $P < 0.05$ ; \*\* $P < 0.01$ ; and \*\*\* $P < 0.001$ . ▨, entire group of patients; ■, diabetic patients; □, nondiabetic patients.

tion, and known peripheral arterial disease: for the highest versus lowest quintiles in diabetic patients, OR (95% CI) 7.15 (2.02–25.30) ( $P < 0.01$ ); in nondiabetic patients, 3.47 (1.43–8.45) ( $P < 0.01$ ).

In patients with CRP levels below the median and absence of both diabetes and impaired kidney function, hospital mortality was 4.8%. In patients with CRP levels above the mean and the presence of both diabetes and impaired kidney function, hospital mortality increased to 35.3% ( $P < 0.001$ ).

**CONCLUSIONS**— The study of the Munich Myocardial Infarction Registry demonstrates that CRP on admission is a strong predictor for hospital mortality in both diabetic and nondiabetic patients. A cutoff of 7 mg/dl for CRP levels on admission is suggested for patients with acute myocardial infarction. In patients with CRP levels equal to or below the cutoff, hospital mortality was 9% compared with 20% in patients with CRP levels above the median ( $P < 0.001$ ).

Diabetic patients presented with higher CRP levels compared with those in nondiabetic subjects. Furthermore, the prevalence of diabetes increased significantly with quintiles of CRP levels.

The standard cutoff for CRP has been reported to be 5 mg/l (4). The use of this cutoff level, however, does not incorporate the overall CRP elevation in acute myocardial infarction, which is considered to occur as a result of the acute event (19,20). The Munich Myocardial Infarction Registry, which investigates patients

with troponin-positive myocardial infarction with and without ST elevation, suggests the use of a 7 mg/dl cutoff for CRP levels. Previously, Lim et al. (21) suggested CRP levels of 10 mg/l and Dibra et al. (22) CRP levels >12 mg/l to detect acute myocardial infarction patients at increased risk for short- and long-term mortality. In the two studies, however, only 147 and 250 patients were included.

In the Munich Myocardial Infarction Registry, the combined presence of diabetes and CRP levels in the two upper quintiles demonstrated that the rate of mortality was six- to sevenfold higher than that in diabetic patients who presented with CRP levels in the lowest tertile. The relationship between atherothrombosis, inflammation, and diabetes is supported in the clinical setting of a registry (23,24).

The Munich Myocardial Infarction Registry emphasizes the importance of CRP levels on admission with regard to the hospital outcome of diabetic and nondiabetic patients. A 7 mg/dl cutoff for CRP levels on admission is suggested for patients with acute myocardial infarction. The excessive risk of mortality in patients with diabetes and elevated CRP will require an intensification of strategies to overcome the poor prognosis.

## References

- Ridker PM, Cushman M, Stampfer MJ, Tracy RP, Hennekens CH: Inflammation, aspirin, and the risk of cardiovascular disease in apparently healthy men. *N Engl*

- J Med* 336:973–979, 1997
- Ross R: Atherosclerosis: an inflammatory disease. *N Engl J Med* 340:115–126, 1999
- Libby P, Ridker PM, Maseri A: Inflammation and atherosclerosis. *Circulation* 105: 1135–1143, 2002
- Otter W, Standl E, Schnell O: [Inflammation and atherogenesis in diabetes mellitus—new therapeutic approaches]. *Herz* 29:524–531, 2004 [in German]
- Rowe IF, Walker LN, Bowyer DE, Soutar AK, Smith LC, Pepys MB: Immunohistochemical studies of C-reactive protein and apolipoprotein B in inflammatory and arterial lesions. *J Pathol* 145:241–249, 1985
- Blake GJ, Ridker PM: C-reactive protein and other inflammatory risk markers in acute coronary syndromes. *J Am Coll Cardiol*. 41:375–425, 2003
- Pai JK, Pischon T, Ma J, Manson JE, Hankinson SE, Joshipura K, Curhan GC, Rifai N, Cannuscio CC, Stampfer MJ, Rimm EB: Inflammatory markers and the risk of coronary heart disease in men and women. *N Engl J Med* 351:2599–2610, 2004
- Blake GJ, Ridker PM: Inflammatory biomarkers and cardiovascular risk prediction. *J Intern Med* 252:283–294, 2002
- Kannel WB, McGee DL: Diabetes and cardiovascular disease: the Framingham study. *JAMA* 241:2035–2038, 1979
- Stern MP: Diabetes and cardiovascular disease: the “common soil” hypothesis. *Diabetes* 44:369–374, 1995
- Festa A, D’Agostino R Jr, Howard G, Mykkanen L, Tracy RP, Haffner SM: Chronic subclinical inflammation as part of the insulin resistance syndrome: the Insulin Resistance Atherosclerosis Study (IRAS). *Circulation* 102:42–47, 2000
- Festa A, Hanley AJ, Tracy RP, D’Agostino R Jr, Haffner SM: Inflammation in the prediabetic state is related to increased insulin resistance rather than decreased insulin secretion. *Circulation* 108:1822–1830, 2003
- Otter W, Kleybrink S, Doering W, Standl E, Schnell O: Hospital outcome of acute myocardial infarction in patients with and without diabetes mellitus. *Diabet Med* 21: 183–187, 2004
- Schnell O, Schäfer O, Kleybrink S, Doering W, Standl E, Otter W: Intensification of therapeutic approaches reduces mortality in diabetic patients with acute myocardial infarction: the Munich Registry. *Diabetes Care* 27:455–460, 2004
- Alpert JS, Thygesen K, Antman E, Bassand JP: Myocardial infarction redefined: a consensus document of The Joint European Society of Cardiology/American College of Cardiology Committee for the Redefinition of Myocardial Infarction. *J Am Coll Cardiol* 36:959–969, 2000
- Bertrand ME, Simoons ML, Fox KA, Wallentin LC, Hamm CW, McFadden E, De Feyter PJ, Specchia G, Ruzyllo W: Man-

- agement of acute coronary syndromes in patients presenting without persistent ST-segment elevation. *Eur Heart J* 23:1809–1840, 2002
17. Braunwald E, Antman EM, Beasley JW, Califf RM, Cheitlin MD, Hochman JS, Jones RH, Kereiakes D, Kupersmith J, Levin TN, Pepine CJ, Schaeffer JW, Smith EE III, Steward DE, Theroux P, Gibbons RJ, Alpert JS, Faxon DP, Fuster V, Gregoratos G, Hiratzka LF, Jacobs AK, Smith SC Jr: ACC/AHA 2002 guideline update for the management of patients with unstable angina and non-ST-segment elevation myocardial infarction: summary article: a report of the American College of Cardiology/American Heart Association Task Force on Practice Guidelines (Committee on the Management of Patients With Unstable Angina). *J Am Coll Cardiol* 40: 1366–1374, 2002
  18. Van de Werf F, Ardissino D, Betriu A, Cokkinos D, Falk E, Fox KA, Julian D, Lengyel M, Neumann FJ, Ruzyllo W, Thygesen C, Underwood SR, Vahanian A, Verheugt FW, Wijns W, Task Force on the Management of Acute Myocardial Infarction of the European Society of Cardiology: Management of acute myocardial infarction in patients presenting with ST-segment elevation. *Eur Heart J* 24:28–66, 2003
  19. Sanchis J, Bodi V, Llacer A, Nunez J, Facila L, Ruiz V, Blasco M, Sanjuan R, Chorro FJ: Usefulness of C-reactive protein and left ventricular function for risk assessment in survivors of acute myocardial infarction. *Am J Cardiol* 94:766–769, 2004
  20. Hoffmann R, Suliman H, Haager P, Christott P, Lepper W, Radke PW, Ortlepp J, Blindt R, Hanrath P, Weber C: Association of C-reactive protein and myocardial perfusion in patients with ST-elevation acute myocardial infarction. *Atherosclerosis* 186:177–183, 2005
  21. Lim SY, Jeong MH, Bae EH, Kim W, Kim JH, Hong YJ, Park HW, Kang DG, Lee YS, Kim KH, Lee SH, Yun KH, Hong SN, Cho JG, Ahn YK, Park JC, Ahn BH, Kim SH, Kang JC: Predictive factors of major adverse cardiac events in acute myocardial infarction patients complicated by cardiogenic shock undergoing primary percutaneous coronary intervention. *Circ J* 69:154–158, 2005
  22. Dibra A, Mehili J, Schwaiger M, Schuhlen H, Bollwein H, Braun S, Neverve J, Schomig A, Kastrati A: Predictive value of basal C-reactive protein levels for myocardial salvage in patients with acute myocardial infarction is dependent on the type of reperfusion treatment. *Eur Heart J* 24:1128–1133, 2003
  23. Biondi-Zoccai GG, Abbate A, Liuzzo G, Biasucci LM: Atherothrombosis, inflammation, and diabetes. *J Am Coll Cardiol* 41:1071–1077, 2003
  24. Gonzalez MA, Selwyn AP: Endothelial function, inflammation, and prognosis in cardiovascular disease. *Am J Med* 115 (Suppl. 8A):99S–106S, 2003
